# Supplementary material
Source: PubMed Central journal article supplement (PMC3411075)

I

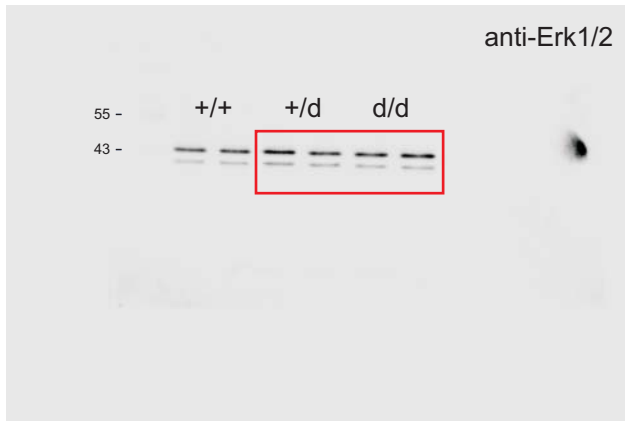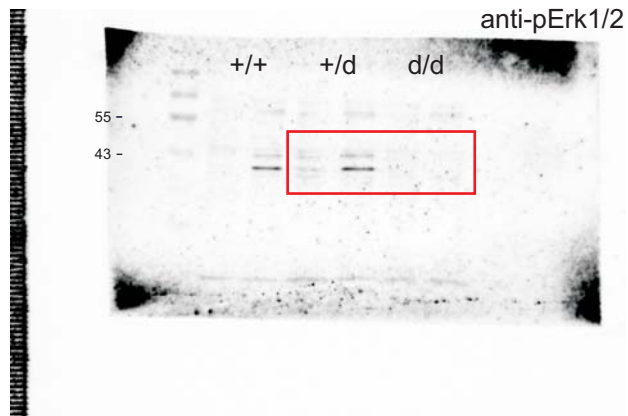

Supplement: emboj2012169s2.pdf [file emboj2012169s2.pdf]

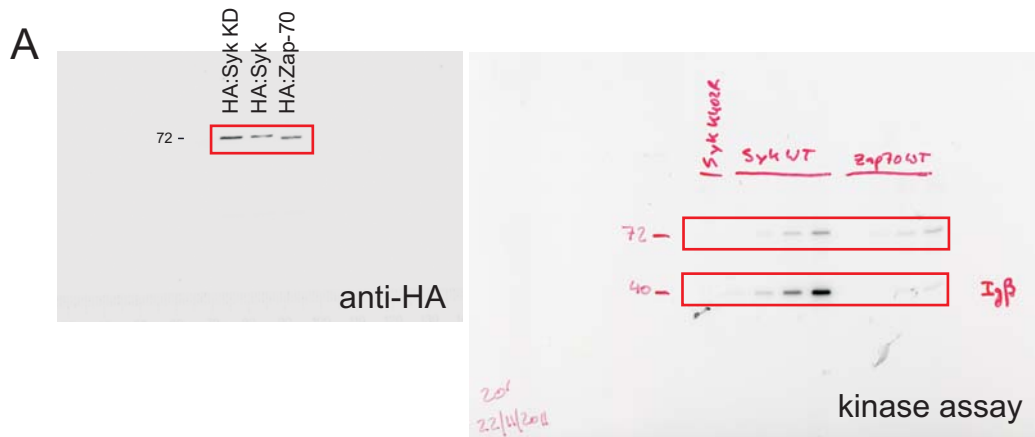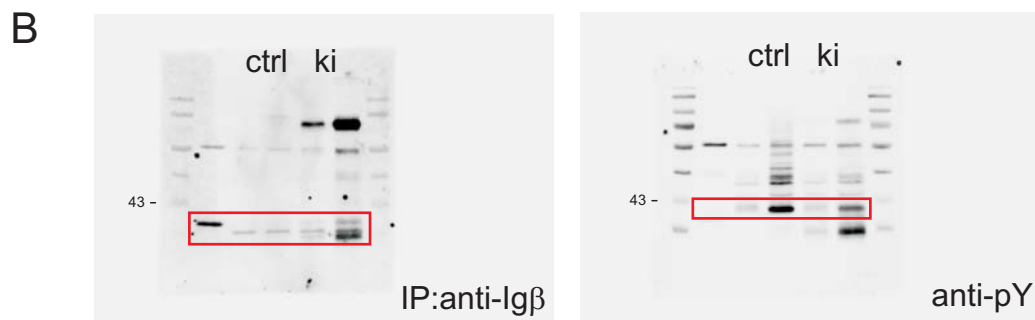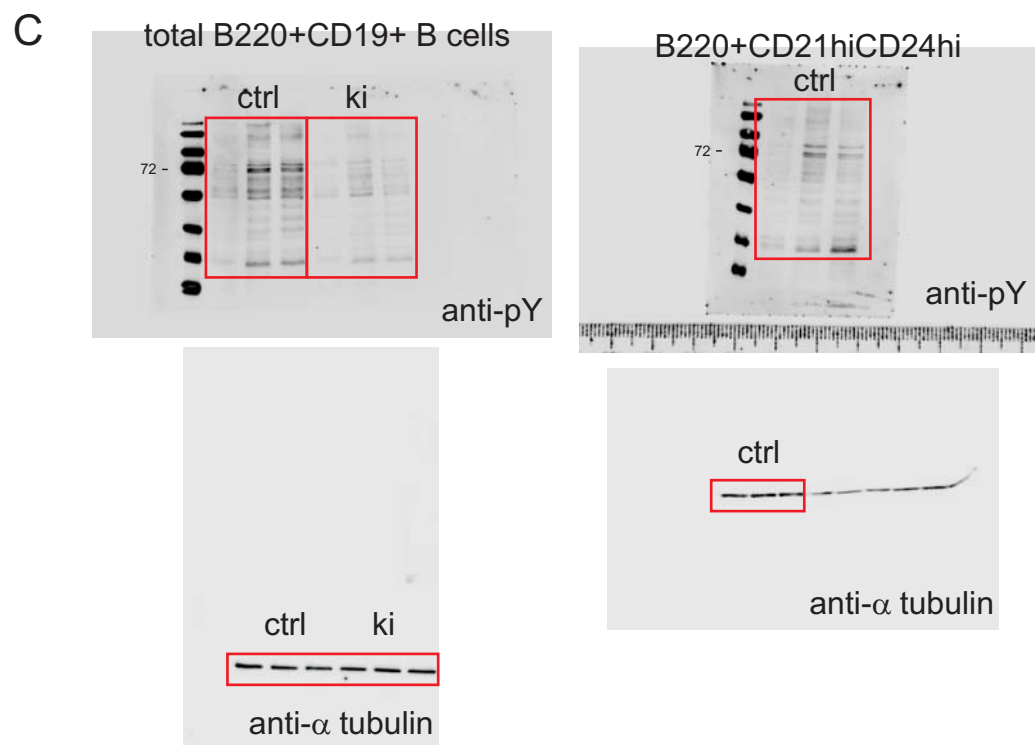

Supplement: emboj2012169s3.pdf [file emboj2012169s3.pdf]

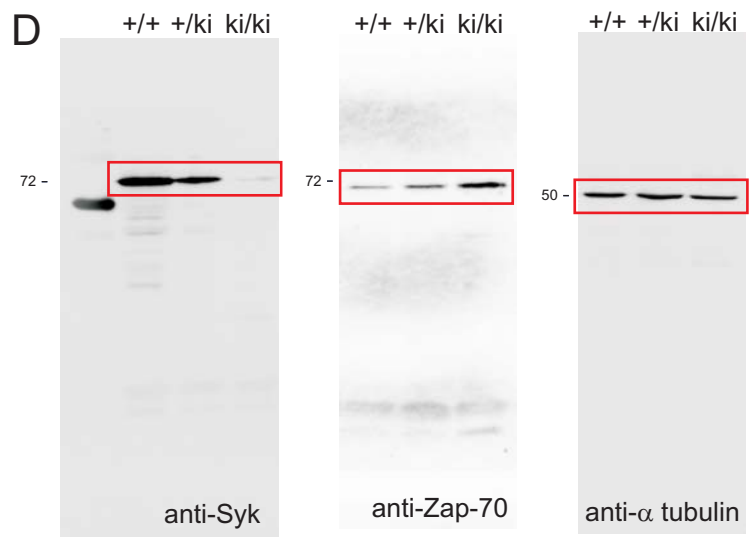

Supplement: emboj2012169s4.pdf [file emboj2012169s4.pdf]

C

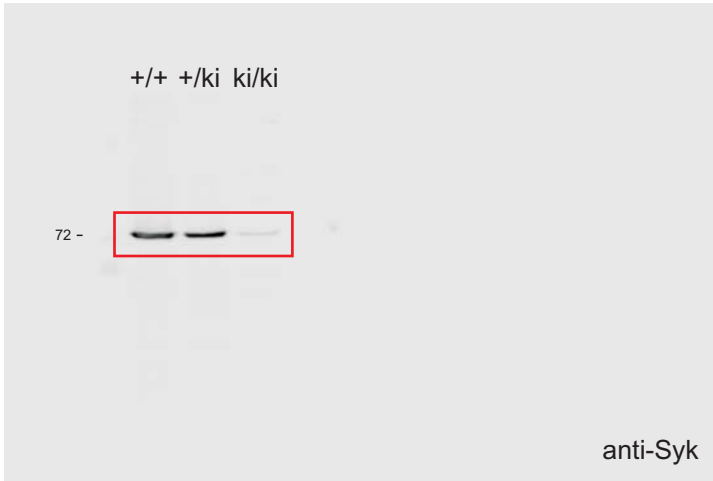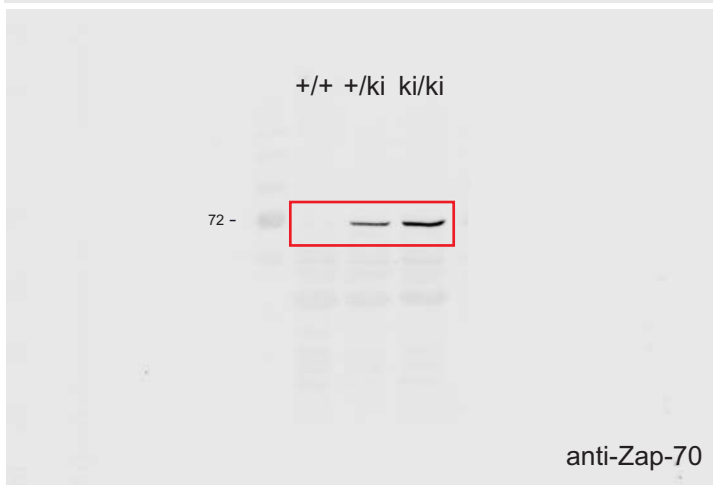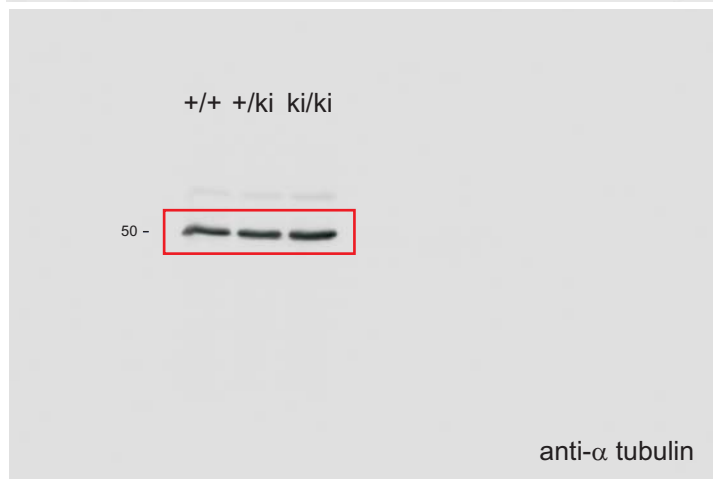

Supplement: emboj2012169s5.pdf [file emboj2012169s5.pdf]
